# Supplementary material for: Influence of Ribavirin on Mumps Virus Population Diversity
Source: MDPI journal article supplement (doi:10.3390/v13122535), 2021-12-17
Supplement: s1 [file s1]

**Figure S1.** MuV replication in A549 cells. A549 cells layers were infected with ZgA/Cro69 at MOI 0.01, supernatants were collected from day 1 to day 6 post infection and titres were determined using plaque assay.

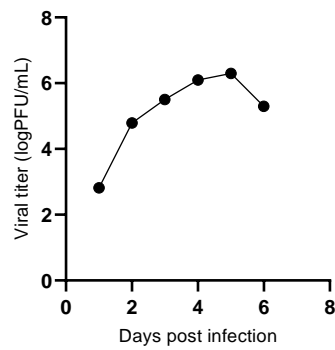

**Figure S2.** RBV effect on Vero and A549 cells: **(a and b)** Cells were seeded in 96-well format and treated with increasing concentrations of RBV (3.9-1000  $\mu$ M) for 72 or 96 hours for Vero (a) and A549 cells (b), respectively, and its influence was assayed using MTT assay. Percentage of cell viability (y axis) is expressed relative to untreated cells. Each point represents mean  $\pm$  standard deviation derived from 2 independent experiments with 6 biological replicates each (n=12). Significant differences among multiple groups were determined using one-way ANOVA and post-hoc Tukey Kramer test; non-significant values are marked by "ns", all other values are statistically significant ( $p < 0.05$ ); **(c and d)** Microscopical images (magnification 400x) of Vero (c) and A549 (d) cells following RBV treatment.

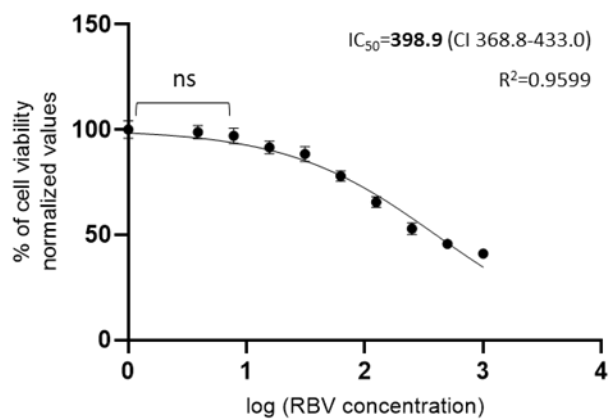

**(a)**

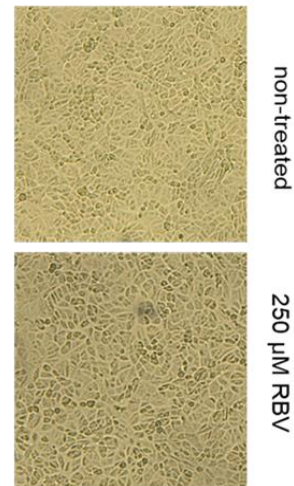

**(c)**

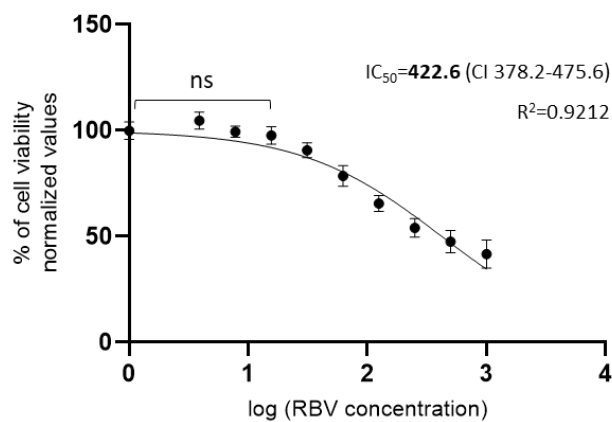

**(b)**

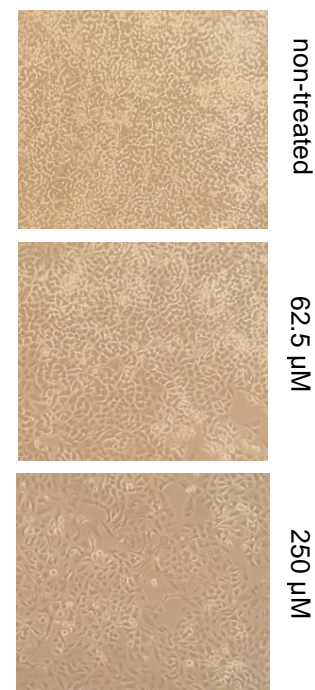

**(d)**

**Figure S3.** Dose-dependent antiviral effect of RBV against ZgA/Cro69. A549 cells were treated with different concentrations of RBV or mock-treated, infected with ZgA/Cro69 at MOI 0.01, and then media with or without RBV was added for additional 96 hours. Titres in supernatants were determined using the plaque assay; titres (logPFU/mL) are plotted on the right y axis, and the titre (number of plaques) of virus obtained from RBV-treated cells as a percentage of the virus titre obtained from untreated, control cells is given on the left y axis. Mean  $\pm$  standard deviations are shown from 3 biological replicates.

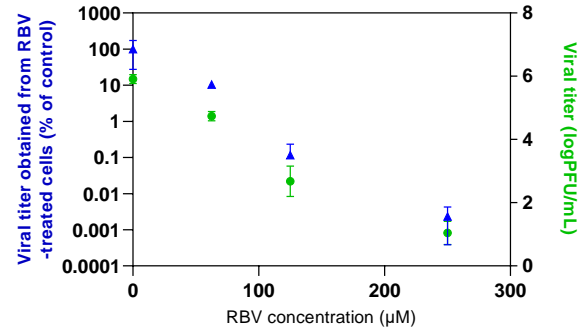

**Figure S4.** A flow chart of performed experiments. Questions that each of the experiments needed to answer are indicated in ovals in chronological order. On top of each bracket that represents description of experimental work, concentrations of RBV used are pointed out. Below brackets are indicated samples that were sequenced using NGS method.

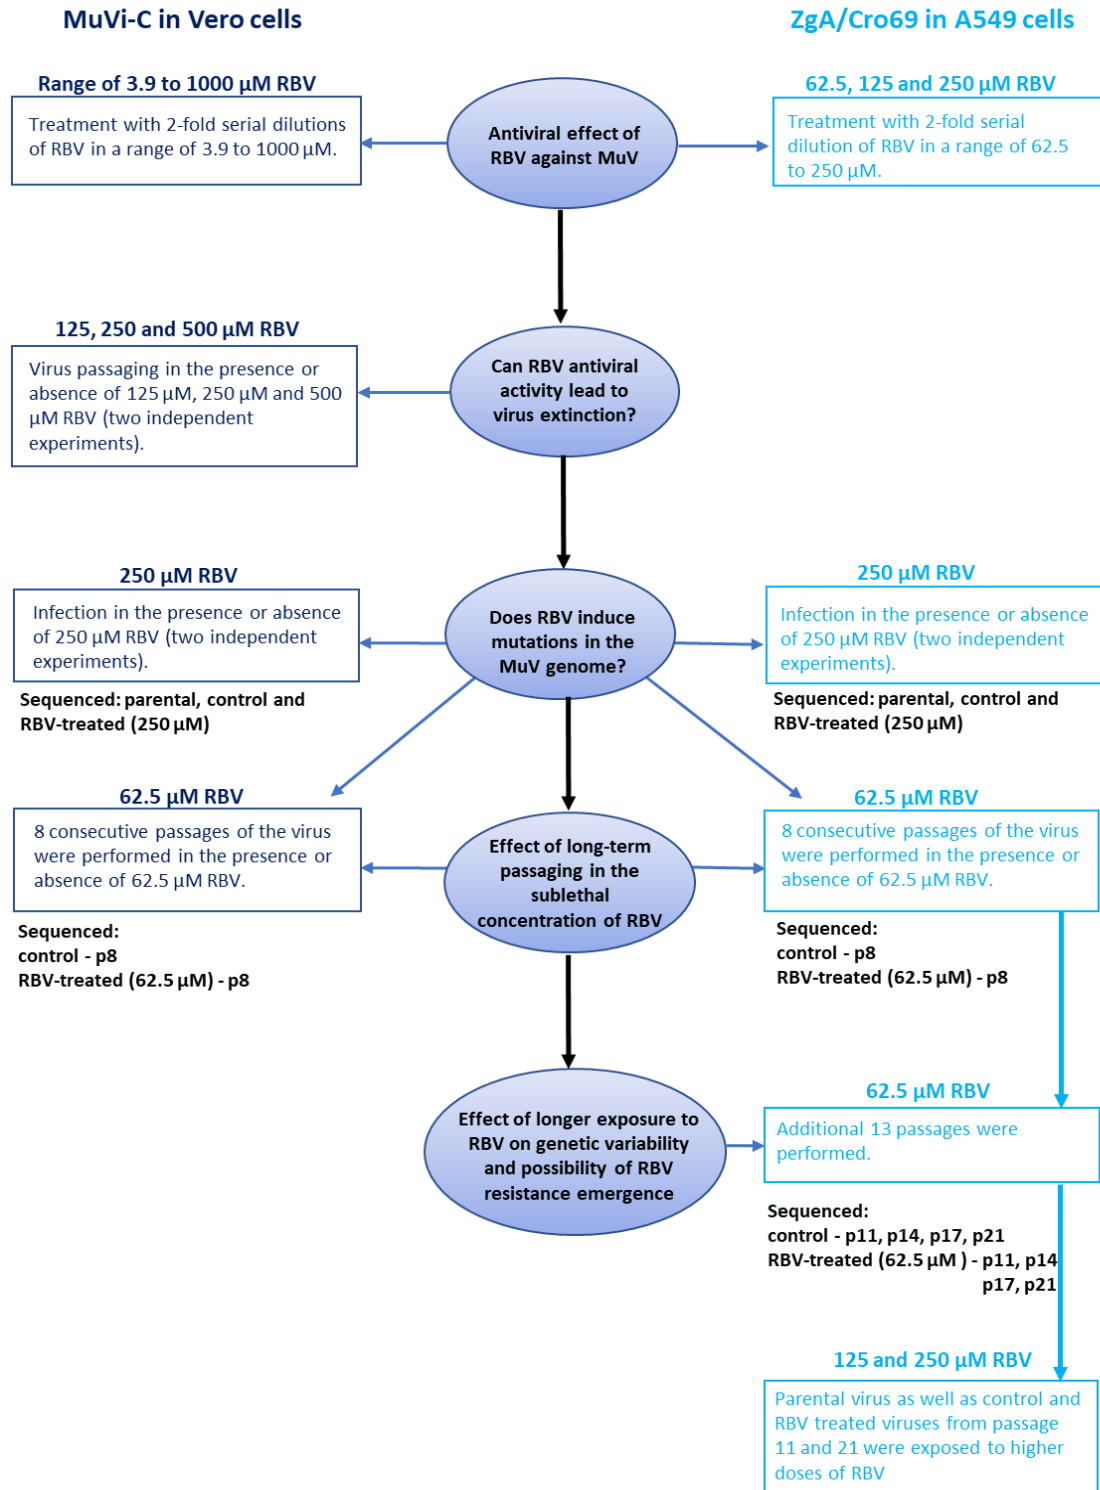

**Figure S5.** Effect of confluence of A549 cells on viral titre. A549 cells were seeded to obtain 50%, 75% and 100% confluence on the day of infection, infected with ZgA/Cro69 at MOI 0.01, supernatants were collected after 96 hours and titres in supernatants were determined using plaque assay. Statistical significance among groups was determined using Kruskal-Wallis One-Way ANOVA (ns, non-significant).

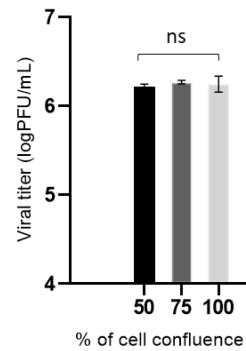

**Figure S6.** Passaging of MuVi-C and ZgA/Cro69 viruses in Vero and A549 cells, respectively, treated with 62.5  $\mu$ M RBV. Cells were treated with RBV-supplemented medium or mock-treated, infected with MuVi-C at MOI 0.001 or ZgA/Cro69 at MOI 0.01, and then RBV-supplemented medium or control medium were added for additional 72 or 96 hours, respectively. Titres in supernatants were determined using plaque assay and supernatants were used for subsequent passage at same MOI.

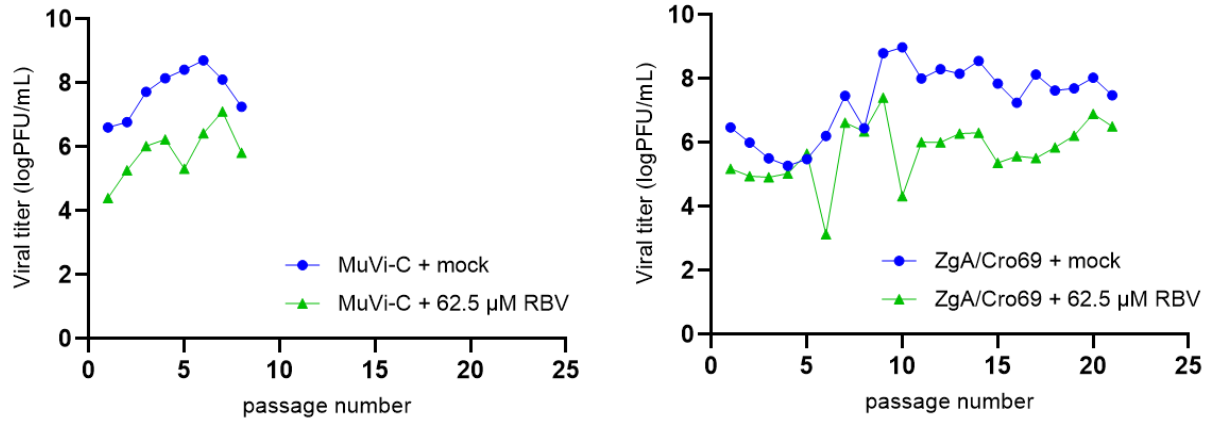

**Table S1.** List of primers used for amplification of PCR fragments for NGS library preparation. Different combination of primers was used for different viral strains. Amplicon size varied from approximately 700 bp to 5500 bp.

| Primer code*        | Primer sequence (5'-3')                                                                 | Genome binding position (bp) |
|---------------------|-----------------------------------------------------------------------------------------|------------------------------|
| N0_nextera(+)       | TGCTGACTGCTCTGATCGTGGTAGCTGATAACCGTCAGT<br>GTGATGTGATAGACCAAGGGGARAAGAAGATGGGATA<br>TTG | 1-29                         |
| Deopti g2(+)        | ATTTGAGGCCGGGCTCGATCCTCACCTT                                                            | 79-107                       |
| Deopti g4(+)        | CAGGACAATCTAGCCACAGCTAACTGCCC                                                           | 1836-1864                    |
| P10rev(-)           | TTGTGGCCTTGCTTAACGAG                                                                    | 2077-2096                    |
| M5(+)               | TAGTCCATGCAGGCGGTCAC                                                                    | 4102-4121                    |
| P START, HindIII(+) | ATTATTAAGCTTATGGATCAATTTATAAAACA                                                        | 4157-4176                    |
| F2(-)               | AGCTGGTTATCAAGGATCT                                                                     | 5102-5120                    |
| F10(+)              | GGCATTGTCACCGATTAGTA                                                                    | 5187-5206                    |
| F15(+)              | GTATGACGCCTGCAGTGGTTC                                                                   | 5234-5254                    |
| MR4ms(-)            | GCTCGAAATTGAGTAGAAGT                                                                    | 5408-5427                    |
| F8(-)               | CCAAGATCCTGTCTGGCAAT                                                                    | 5457-5476                    |
| LZ9(+)              | TTCTCTATCGGCCATCCACT                                                                    | 7082-7101                    |
| LZ13(+)             | TTGTCTGTGCCTGGAATCAG                                                                    | 7752-7771                    |
| LZ6(-)              | GCTCGCAATTTGTAAGTAGG                                                                    | 7774-7793                    |
| LZ14(-)             | AGAGGAGTTCATACGGCCAC                                                                    | 7891-7910                    |
| L9(+)               | AAGGCTAATGCGAAGCACTC                                                                    | 10550-10568                  |
| L26(-)              | ATTCAGAGCTGTATCAAGGTCA                                                                  | 10615-10636                  |
| L8(-)               | CCTCCACGAGGAGAACTA                                                                      | 10650-10668                  |
| MR9ms(+)            | AGAAGGAGCAAGCTTATAAA                                                                    | 10830-10849                  |
| L12(-)              | GTCTCACCTCCAGTGAATACC                                                                   | 11715-11735                  |
| L23(-)              | CTGATGATTGGCCCTTTAGGA                                                                   | 14760-14780                  |
| L24(+)              | GGACTCCAAGCACAAGAA                                                                      | 14649-14666                  |
| L25_nextera(-)      | TGGTCATAATGCTGACTGCTGTGATCGTGGTAGTAGATT<br>AGGGTCAGTGTGATGTACCAAGGGGAGAAAGTAAATC<br>AAT | 15360-15384                  |

\*(+) or (-) stands for forward or reverse primer orientation, respectively.

**Table S2.** NGS data description.

| Sample                             | No. of reads | No. of reads after QC | % of mapped reads | No. of reads after removal of reads with more than 2 mismatches to reference | Mean coverage | Mean coverage St. Dev. |
|------------------------------------|--------------|-----------------------|-------------------|------------------------------------------------------------------------------|---------------|------------------------|
| MuVi-C parental                    | 470.590      | 326.368               | 99.5              | 323.441                                                                      | 2.637         | 819                    |
| MuVi-C control p1, exp 1           | 791.188      | 641.322               | 98.6              | 628.967                                                                      | 4.655         | 4.567                  |
| MuVi-C RBV-treated p1, exp 1       | 1.057.484    | 864.258               | 95.1              | 816.756                                                                      | 6.075         | 4.875                  |
| MuVi-C control p1, exp 2           | 1.439.204    | 1.197.064             | 99.4              | 1.183.387                                                                    | 8.930         | 10.065                 |
| MuVi-C RBV-treated p1, exp 2       | 4.654.772    | 3.957.698             | 97.1              | 3.821.604                                                                    | 29.287        | 16.693                 |
| MuVi-C control p8, exp 1           | 633.024      | 400.156               | 98.2              | 391.035                                                                      | 3.132         | 2.296                  |
| MuVi-C RBV-treated p8, exp 1       | 630.754      | 357.894               | 95.1              | 338.050                                                                      | 2.650         | 5.587                  |
| ZgA/Cro69 parental                 | 2.835.066    | 1.074.502             | 96.0              | 1.017.702                                                                    | 7.559         | 2.378                  |
| ZgA/Cro69 RBV-treated p1, exp 1    | 880.938      | 589.464               | 98.6              | 578.628                                                                      | 4.675         | 4.468                  |
| ZgA/Cro69 control p1, exp 1        | 671.860      | 426.100               | 98.6              | 418.204                                                                      | 3.354         | 2.458                  |
| ZgA/Cro69 RBV-treated p1, exp 2    | 564.518      | 340.510               | 98.0              | 3.310.943                                                                    | 2.643         | 2.466                  |
| ZgA/Cro69 control p1, exp 2        | 564.172      | 348.572               | 98.7              | 341.971                                                                      | 2.736         | 2.386                  |
| ZgA/Cro69 control p8/1, exp 1      | 1.297.784    | 556.594               | 94.5              | 516.801                                                                      | 3.911         | 10.219                 |
| ZgA/Cro69 control p8/2, exp 1      | 1.951.242    | 825.126               | 93.6              | 758.083                                                                      | 5.733         | 18.737                 |
| ZgA/Cro69 RBV-treated p8/1, exp 1  | 438.630      | 173.972               | 93.9              | 159.405                                                                      | 1.193         | 3.337                  |
| ZgA/Cro69 RBV-treated p8/2, exp 1  | 1.295.064    | 513.464               | 93.4              | 468.522                                                                      | 3.498         | 12.113                 |
| ZgA/Cro69 control p11/1, exp 1     | 2.524.084    | 914.508               | 95.9              | 865.583                                                                      | 6.392         | 2.432                  |
| ZgA/Cro69 RBV-treated p11/1, exp 1 | 2.924.456    | 1.106.944             | 95.8              | 1.047.245                                                                    | 7.769         | 3.489                  |
| ZgA/Cro69 control p14/1, exp 1     | 2.762.406    | 1.115.266             | 96.8              | 1.069.556                                                                    | 8.021         | 4.602                  |
| ZgA/Cro69 RBV-treated p14/1, exp 1 | 2.625.140    | 972.934               | 95.6              | 919.329                                                                      | 6.813         | 2.061                  |
| ZgA/Cro69 control p17/1, exp 1     | 1.656.620    | 695.950               | 93.8              | 641.171                                                                      | 4.834         | 13.815                 |
| ZgA/Cro69 control p17/2, exp 1     | 1.065.928    | 410.048               | 93.6              | 374.786                                                                      | 2.794         | 8.264                  |
| ZgA/Cro69 RBV-treated p17/1, exp 1 | 1.619.980    | 638.200               | 96.2              | 599.177                                                                      | 4.482         | 6.836                  |
| ZgA/Cro69 RBV-treated p17/2, exp 1 | 1.423.842    | 535.614               | 96.8              | 504.179                                                                      | 3.744         | 4.189                  |



|                                    |           |           |      |           |        |        |
|------------------------------------|-----------|-----------|------|-----------|--------|--------|
| ZgA/Cro69 control p21/1, exp 1     | 1.232.634 | 529.144   | 97.1 | 504.498   | 3.821  | 4.005  |
| ZgA/Cro69 control p21/2, exp 1     | 3.224.044 | 1.447.894 | 96.5 | 1.375.540 | 10.453 | 12.337 |
| ZgA/Cro69 RBV-treated p21/1, exp 1 | 1.546.698 | 634.712   | 92.8 | 576.148   | 4.337  | 14.914 |
| ZgA/Cro69 RBV-treated p21/2, exp 1 | 1.458.256 | 596.106   | 95.4 | 556.035   | 4.180  | 7.578  |

p, passage

exp, experiment

/1 or /2, samples sequenced in duplicate

QC, quality control

**Table S3.** Changes in the consensus sequence (based on full length genome sequences) during long-term passaging of RBV-treated (62.5 µM) ZgA/Cro69 virus that are not present as consensus in the controls nor in the parental virus.

| Nucleotide change | Amino acid change | Position in the genome (gene) | Parental | Control | RBV-treated |
|-------------------|-------------------|-------------------------------|----------|---------|-------------|---------|-------------|---------|-------------|---------|-------------|---------|-------------|
|                   |                   |                               | p0       | p8      | p8          | p11     | p11         | p14     | p14         | p17     | p17         | p21     | p21         |
| G --> A           | Arg --> Lys       | 315 (N)                       | -        | -       | -           | -       | +           | -       | -           | -       | +           | -       | +           |
|                   |                   |                               |          |         |             |         | 53%         |         | 16%         |         | 80%         |         | 87%         |
| G --> A           | Val --> Met       | 1775 (N)                      | -        | -       | -           | -       | +           | -       | -           | -       | +           | -       | +           |
|                   |                   |                               |          |         |             |         | 55%         |         | 14%         |         | 80%         |         | 87%         |
| C --> T           | -                 | 2503 (P)                      | -        | -       | -           | -       | -           | -       | -           | -       | +           | -       | +           |
|                   |                   |                               |          |         |             |         | 41%         |         | 11%         |         | 72%         |         | 94%         |
| C --> T           | Pro --> Ser       | 3474 (M)                      | -        | -       | +           | -       | +           | -       | +           | -       | +           | -       | +           |
|                   |                   |                               | 30%      |         | 90%         |         | 99%         |         | 100%        |         | 100%        |         | 98%         |
| C --> T           | Pro --> Leu       | 3670 (M)                      | -        | -       | +           | -       | +           | -       | +           | -       | +           | -       | +           |
|                   |                   |                               | 30%      |         | 87%         |         | 100%        |         | 100%        |         | 100%        |         | 100%        |
| G --> A           | -                 | 4981 (F)                      | -        | -       | -           | -       | -           | -       | -           | -       | -           | -       | +           |
|                   |                   |                               |          |         |             |         |             |         |             |         | 21%         |         | 51%         |
| A --> G           | -                 | 5178 (F)                      | -        | -       | +           | -       | +           | -       | +           | -       | +           | -       | +           |
|                   |                   |                               |          |         | 92%         |         | 92%         |         | 98%         |         | 100%        |         | 100%        |
| C --> T           | Thr --> Ile       | 5261 (F)                      | -        | -       | -           | -       | +           | -       | -           | -       | +           | -       | +           |
|                   |                   |                               |          |         | 2%          |         | 54%         |         | 15%         |         | 82%         |         | 90%         |
| T --> A           | Ser --> Arg       | 6138 (F)                      | -        | -       | +           | -       | +           |         | +           | -       | +           | -       | +           |
|                   |                   |                               | 15%      |         | 92%         |         | 99%         |         | 100%        |         | 100%        |         | 100%        |
| G --> A           | -                 | 10102 (L)                     | -        | -       | -           | -       | -           | -       | -           | -       | -           | -       | +           |
|                   |                   |                               |          |         |             |         |             |         | 11%         |         | 37%         |         | 62%         |
| G -->T            | Glu --> Asp       | 11584 (L)                     | -        | -       | +           | -       | +           | -       | +           | -       | +           | -       | +           |
|                   |                   |                               |          |         | 90%         |         | 94%         |         | 99%         |         | 100%        |         | 100%        |
| G --> A           | Gly --> Glu       | 12051 (L)                     | -        | -       | -           | -       | -           | -       | +           | -       | +           | -       | +           |
|                   |                   |                               |          |         |             |         | 16%         |         | 52%         |         | 80%         |         | 85%         |
| G --> A           | Val --> Ile       | 12800 (L)                     | -        | -       | -           | -       | -           | -       | -           | -       | -           | -       | +           |
|                   |                   |                               |          |         |             |         |             |         |             |         | 23%         |         | 50%         |
| C --> T           | -                 | 12874 (L)                     | -        | -       | -           | -       | -           | -       | +           | -       | +           | -       | +           |
|                   |                   |                               |          |         |             |         | 16%         |         | 50%         |         | 79%         |         | 13%         |
| A --> T           | Tyr --> Phe       | 13332 (L)                     | -        | -       | +           | -       | +           | -       | +           | -       | +           | -       | +           |
|                   |                   |                               | 29%      |         | 92%         |         | 100%        |         | 100%        |         | 100%        |         | 100%        |
| G --> A           | -                 | 13417 (L)                     | -        | -       | -           | -       | -           | -       | +           | -       | +           | -       | +           |
|                   |                   |                               |          |         |             |         | 16%         |         | 48%         |         | 80%         |         | 88%         |
| G --> A           | Val --> Ile       | 14018 (L)                     | -        | -       | -           | -       | -           | -       | +           | -       | +           | -       | +           |
|                   |                   |                               |          |         |             |         | 17%         |         | 51%         |         | 82%         |         | 90%         |

Nucleotide changes are given as appearing in the sequenced DNA; for example, G-to-A corresponds to C-to-U, and C-to-T to G-to-A in the viral RNA genome.

"-" indicates that nucleotide change is not present in viral population in more than 50%; if the changed nucleotide is present at frequency >1%, the percentage is indicated.

**Table S4.** Percentage of each mutation type occurring in control and RBV-treated (250  $\mu$ M) MuVi-C and ZgA/Cro69 viruses from the first passage.

|                      |                   | MuVi-C    |           |           |           | ZgA/Cro69 |           |           |           |
|----------------------|-------------------|-----------|-----------|-----------|-----------|-----------|-----------|-----------|-----------|
|                      |                   | C1        | R1        | C2        | R2        | C1        | R1        | C2        | R2        |
| <b>transitions</b>   | <b>C --&gt; U</b> | <b>18</b> | <b>45</b> | <b>17</b> | <b>21</b> | <b>25</b> | <b>40</b> | <b>20</b> | <b>23</b> |
|                      | <b>G --&gt; A</b> | <b>6</b>  | <b>21</b> | <b>17</b> | <b>36</b> | <b>7</b>  | <b>2</b>  | <b>8</b>  | <b>18</b> |
|                      | <b>U --&gt; C</b> | 12        | 6         | 8         | 17        | 18        | 21        | 20        | 18        |
|                      | <b>A --&gt; G</b> | 6         | 3         | 8         | 2         | 18        | 19        | 20        | 18        |
| <b>transversions</b> | <b>U --&gt; G</b> | 0         | 3         | 0         | 4         | 7         | 2         | 8         | 0         |
|                      | <b>U --&gt; A</b> | 18        | 9         | 17        | 4         | 7         | 7         | 8         | 5         |
|                      | <b>G --&gt; U</b> | 24        | 3         | 0         | 2         | 4         | 2         | 4         | 3         |
|                      | <b>G --&gt; C</b> | 0         | 6         | 0         | 4         | 0         | 0         | 0         | 0         |
|                      | <b>A --&gt; U</b> | 0         | 0         | 8         | 2         | 7         | 2         | 8         | 5         |
|                      | <b>A --&gt; C</b> | 0         | 0         | 8         | 0         | 4         | 2         | 4         | 8         |
|                      | <b>C --&gt; G</b> | 0         | 3         | 0         | 0         | 0         | 0         | 0         | 0         |
|                      | <b>C --&gt; A</b> | 18        | 0         | 17        | 6         | 4         | 0         | 0         | 5         |

C, control virus

R, RBV-treated virus

1 or 2, results from individual experiments

**Table S5.** Percentage of each mutation type occurring in control and RBV-treated (62.5  $\mu$ M) MuVi-C and ZgA/Cro69 viruses from the passages 8 and 21.

|               |         | MuVi-C (passage 8) |    | ZgA/Cro69 (passage 8) |    | ZgA/Cro69 (passage 21) |    |
|---------------|---------|--------------------|----|-----------------------|----|------------------------|----|
|               |         | C                  | R  | C                     | R  | C                      | R  |
| transitions   | C --> U | 9                  | 36 | 18                    | 31 | 18                     | 46 |
|               | G --> A | 19                 | 28 | 16                    | 51 | 21                     | 42 |
|               | U --> C | 9                  | 11 | 14                    | 2  | 11                     | 1  |
|               | A --> G | 25                 | 14 | 27                    | 4  | 25                     | 3  |
| transversions | U --> G | 0                  | 1  | 0                     | 2  | 0                      | 1  |
|               | U --> A | 6                  | 3  | 5                     | 2  | 4                      | 1  |
|               | G --> U | 6                  | 3  | 5                     | 4  | 11                     | 3  |
|               | G --> C | 0                  | 0  | 2                     | 0  | 4                      | 0  |
|               | A --> U | 6                  | 2  | 2                     | 2  | 0                      | 1  |
|               | A --> C | 9                  | 0  | 5                     | 0  | 4                      | 0  |
|               | C --> G | 0                  | 0  | 0                     | 0  | 0                      | 1  |
|               | C --> A | 9                  | 2  | 7                     | 4  | 4                      | 2  |

C, control virus

R, RBV-treated virus
